# Supplementary material for: xCell: digitally portraying the tissue cellular heterogeneity landscape
Source: Genome Biol. 2017 Nov 15;18:220. doi: 10.1186/s13059-017-1349-1 (PMC5688663; doi:10.1186/s13059-017-1349-1)
Supplement: Supplementary file 1 — Summary table of primary cell types used in this study. (XLSX 51 kb) [file 13059_2017_1349_MOESM1_ESM.xlsx]

## Sheet: Sheet1
Full name	Cell types	FANTOM5	ENCODE	Blueprint	IRIS	Novershtern	HPCA	# of sources	# of samples	Group	Subgroup	Parent/Child
Monocytes	Monocytes	42	0	16	12	5	66	5	141	Non-lymphocytes	Myeloid	Parent
CD8+ T-cells	CD8+ T-cells	11	0	3	4	7	16	5	41	Lymphocytes	Lymphoid	Parent
NK cells	NK cells	3	0	3	15	6	5	5	32	Lymphocytes	Lymphoid	Parent
Macrophages	Macrophages	27	0	18	12	0	59	4	116	Non-lymphocytes	Myeloid	Parent
Endothelial cells	Endothelial cells	22	14	4	0	0	48	4	88	Non-Hematopoietic	Stroma	Parent
Dendritic cells	DC	4	0	1	6	0	45	4	56	Non-lymphocytes	Myeloid	Parent
Neutrophils	Neutrophils	3	0	23	5	0	21	4	52	Non-lymphocytes	Myeloid	Parent
Erythrocytes	Erythrocytes	2	0	7	0	33	8	4	50	HSC	HSC	HSC
CD4+ naive T-cells	CD4+ naive T-cells	6	0	0	3	7	6	4	22	Lymphocytes	Lymphoid	CD4+ T-cells
Multipotent rogenitors	MPP	2	1	3	0	10	0	4	16	HSC	HSC	Parent
Smooth muscle cells	Smooth muscle cells	120	16	0	0	0	16	3	152	Non-Hematopoietic	Stroma	Parent
Fibroblasts	Fibroblasts	73	20	0	0	0	15	3	108	Non-Hematopoietic	Stroma	Parent
Epithelial cells	Epithelial cells	53	18	0	0	0	16	3	87	Non-Hematopoietic	Epithelial	Parent
Keratinocytes	Keratinocytes	4	2	0	0	0	25	3	31	Non-Hematopoietic	Epithelial	Epithelial cells
Chondrocytes	Chondrocytes	5	2	0	0	0	22	3	29	Non-Hematopoietic	Stroma	Parent
Adipocytes	Adipocytes	18	7	0	0	0	3	3	28	Non-Hematopoietic	Stroma	Parent
B-cells	B-cells	11	0	0	0	10	7	3	28	Lymphocytes	Lymphoid	Parent
CD4+ T-cells	CD4+ T-cells	3	0	11	0	0	12	3	26	Lymphocytes	Lymphoid	Parent
CD8+ effector memory T-cells	CD8+ Tem	0	0	1	0	10	8	3	19	Lymphocytes	Lymphoid	CD8+ T-cells
Common myeloid progenitors	CMP	0	0	11	0	4	2	3	17	HSC	HSC	HSC
Granulocyte-macrophage progenitors	GMP	0	0	3	0	4	8	3	15	HSC	HSC	HSC
Megakaryocyte–erythroid progenitors	MEP	0	0	4	0	9	2	3	15	HSC	HSC	HSC
Regulatory T-cells	Tregs	12	0	1	0	0	2	3	15	Lymphocytes	Lymphoid	CD4+ T-cells
Hematopoietic stem cells	HSC	4	0	6	0	4	0	3	14	HSC	HSC	Parent
Plasma cells	Plasma cells	0	0	4	7	0	3	3	14	Lymphocytes	Lymphoid	B-cells
CD4+ central memory T-cells	CD4+ Tcm	0	0	1	0	7	5	3	13	Lymphocytes	Lymphoid	CD4+ T-cells
Microvascular endothelial cells	mv Endothelial cells	3	8	0	0	0	2	3	13	Non-Hematopoietic	Stroma	Endothelial cells
CD4+ effector memory T-cells	CD4+ Tem	0	0	1	0	7	4	3	12	Lymphocytes	Lymphoid	CD4+ T-cells
Memory B-cells	Memory B-cells	0	0	1	8	0	3	3	12	Lymphocytes	Lymphoid	B-cells
CD8+ central memory T-cells	CD8+ Tcm	0	0	1	0	7	3	3	11	Lymphocytes	Lymphoid	CD8+ T-cells
naive B-cells	naive B-cells	0	0	2	0	5	3	3	10	Lymphocytes	Lymphoid	B-cells
Eosinophils	Eosinophils	3	0	1	0	5	0	3	9	Non-lymphocytes	Myeloid	Parent
Macrophages M1	Macrophages M1	77	0	3	0	0	0	2	80	Non-lymphocytes	Myeloid	Macrophages
Myocytes	Myocytes	62	4	0	0	0	0	2	66	Non-Hematopoietic	Stroma	Skeletal muscle
Lymphatic endothelial cells	ly Endothelial cells	51	0	0	0	0	14	2	65	Non-Hematopoietic	Stroma	Endothelial cells
Mesenchymal stem cells	MSC	18	0	0	0	0	21	2	39	Non-Hematopoietic	Stroma	Parent
Macrophages M2	Macrophages M2	0	0	4	0	0	25	2	29	Non-lymphocytes	Myeloid	Macrophages
Osteoblasts	Osteoblast	6	0	0	0	0	15	2	21	Non-Hematopoietic	Stroma	Skeletal muscle
Activated dendritic cells	aDC	0	0	0	6	0	10	2	16	Non-lymphocytes	Myeloid	DC
Preadipocytes	Preadipocytes	14	2	0	0	0	0	2	16	Non-Hematopoietic	Stroma	Adipocytes
Melanocytes	Melanocytes	9	4	0	0	0	0	2	13	Non-Hematopoietic	Epithelial	Parent
Skeletal muscle cells	Skeletal muscle cells	6	7	0	0	0	0	2	13	Non-Hematopoietic	Stroma	Parent
CD4+ memory T-cells	CD4+ memory T-cells	6	0	0	6	0	0	2	12	Lymphocytes	Lymphoid	CD4+ memory T-cells
Megakaryocytes	Megakaryocytes	0	0	5	0	7	0	2	12	HSC	HSC	HSC
pro B-cells	pro B-cells	0	0	0	0	8	2	2	10	Lymphocytes	Lymphoid	B-cells
Basophils	Basophils	3	0	0	0	6	0	2	9	Non-lymphocytes	Myeloid	Parent
Xonventional dendritic cells	cDC	0	0	0	0	5	4	2	9	Non-lymphocytes	Myeloid	DC
Astrocytes	Astrocytes	6	2	0	0	0	0	2	8	Non-Hematopoietic	Epithelial	Parent
Plasmacytoid dendritic cells	pDC	3	0	0	0	5	0	2	8	Non-lymphocytes	Myeloid	DC
Pericytes	Pericytes	6	2	0	0	0	0	2	8	Non-Hematopoietic	Stroma	Fibroblasts
Neurons	Neurons	3	4	0	0	0	0	2	7	Non-Hematopoietic	Epithelial	Astrocytes
Class-switched memory B-cells	Class-switched memory B-cells	0	0	1	0	5	0	2	6	Lymphocytes	Lymphoid	B-cells
Hepatocytes	Hepatocytes	3	0	0	0	0	3	2	6	Non-Hematopoietic	Epithelial	Parent
Mesangial cells	Mesangial cells	3	2	0	0	0	0	2	5	Non-Hematopoietic	Stroma	Fibroblasts
Immature dendritic cells	iDC	0	0	0	0	0	29	1	29	Non-lymphocytes	Myeloid	DC
Mast cells	Mast cells	9	0	0	0	0	0	1	9	Non-lymphocytes	Myeloid	Parent
Type 2 T-helper cells	Th2 cells	0	0	0	6	0	0	1	6	Lymphocytes	Lymphoid	CD4+ T-cells
Common lymphoid progenitors	CLP	0	0	5	0	0	0	1	5	HSC	HSC	HSC
Platelets	Platelets	0	0	0	0	0	5	1	5	Non-lymphocytes	HSC	Parent
Type 1 T-helper cells	Th1 cells	0	0	0	5	0	0	1	5	Lymphocytes	Lymphoid	CD4+ T-cells
CD8+ naive T-cells	CD8+ naive T-cells	0	0	0	0	0	4	1	4	Lymphocytes	Lymphoid	CD8+ T-cells
Natural killer T-cells	NKT	0	0	0	0	4	0	1	4	Lymphocytes	Lymphoid	Parent
Sebocytes	Sebocytes	3	0	0	0	0	0	1	3	Non-Hematopoietic	Epithelial	Epithelial cells
Gamma delta T-cells	Tgd cells	0	0	0	0	0	2	1	2	Lymphocytes	Lymphoid	CD4+ T-cells
